# Supplementary material for: Data on physicochemical properties of active films derived from plantain flour/PCL blends developed under reactive extrusion conditions
Source: PubMed Central journal article supplement (PMC5645474; doi:10.1016/j.dib.2017.09.071), 2017-09-30
Supplement: mmc1.pdf [file mmc1.pdf]

## **Conflicts of interest**

The authors declare no conflict of interest.
